# Supplementary material for: Slip bursts during coalescence of slow slip events in Cascadia
Source: PubMed Central journal article supplement (PMC7195424; doi:10.1038/s41467-020-15494-4), 2020-05-01
Supplement: 41467_2020_15494_MOESM3_ESM.pdf [file 41467_2020_15494_MOESM3_ESM.pdf]

## Description of Additional Supplementary Files

**File name:** Supplementary Movie 1

**Description:** Daily slip velocity during the entire slow slip sequence. Dates are given at the top of the map. Color maps represent slip velocities, blue dots indicate tremors.
